# Supplementary material for: Antigenic properties of the SARS-CoV-2 nucleoprotein are altered by the RNA admixture
Source: PeerJ journal article supplement (doi:10.7717/peerj.12751), 2022-01-07
Supplement: NP_FigS1.pdf [file NP_FigS1.pdf]

>NP

MSDNGPQNQRNAPRITFGGPSDSTGSNQNNGERSGARSKQRRPQGLPNNTASWFTALTQHGKEDLKFPARGQGVPI  
NSSPDDQIGYYRRATRRIRGGDGKMKDLSRWYFYLLGTGPEAGLPYGANKDGIWVATEGALNTPKDHIGTRNPAN  
NAAIVLQLPQGTTLPKGFYAEGSRGGSQASSRSSSRNSSRNSTPGSSRGTSARMAGNGGDAALALLLDRLNQLES  
KMSGKGQQQQGQTVTKKSAEASKKPRQKRTATKAYNVTQAFGRRGPEQTQGNFGDQELIRQGTDYKHWPQIAQF  
APSASAFFGMSRIGMEVTPSGTWLTYTGAIKDDKDPNFKDQVILLNKHIDAYKTFPTEPKKDKKKKADETQALPQRQ  
KKQQTVTLLPAADLDDFSKQLQQSMSSADSTQAHHHHHHHHHH

>NTD

MSDNGPQNQRNAPRITFGGPSDSTGSNQNNGERSGARSKQRRPQGLPNNTASWFTALTQHGKEDLKFPARGQGVPI  
NSSPDDQIGYYRRATRRIRGGDGKMKDLSRWYFYLLGTGPEAGLPYGANKDGIWVATEGALNTPKDHIGTRNPAN  
NAAIVLQLPQGTTLPKGFYAEGSRGGSQASSRSSSRNSSRNSTPGSSRGTSARMAGNGGDAALAHHHHHHHHHH

>CTD

MVLRTSVMLLALLLDRLNQLESKMSGKGQQQQGQTVTKKSAEASKKPRQKRTATKAYNVTQAFGRRGPEQTQGN  
FGDQELIRQGTDYKHWPQIAQFAPSASAFFGMSRIGMEVTPSGTWLTYTGAIKDDKDPNFKDQVILLNKHIDAYKTFP  
PTEPKKDKKKKADETQALPQRQKKQQTVTLLPAADLDDFSKQLQQSMSSADSTQAHHHHHHHHHH
