# Supplementary material for: Antigenic properties of the SARS-CoV-2 nucleoprotein are altered by the RNA admixture
Source: PeerJ journal article supplement (doi:10.7717/peerj.12751), 2022-01-07

# NP-NTD

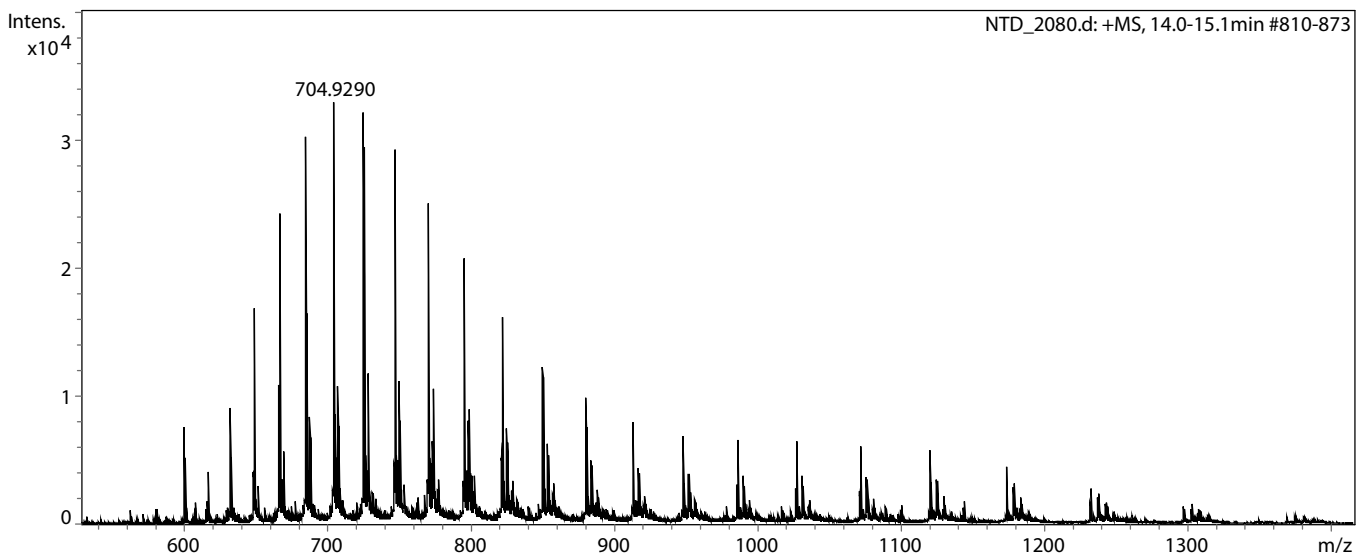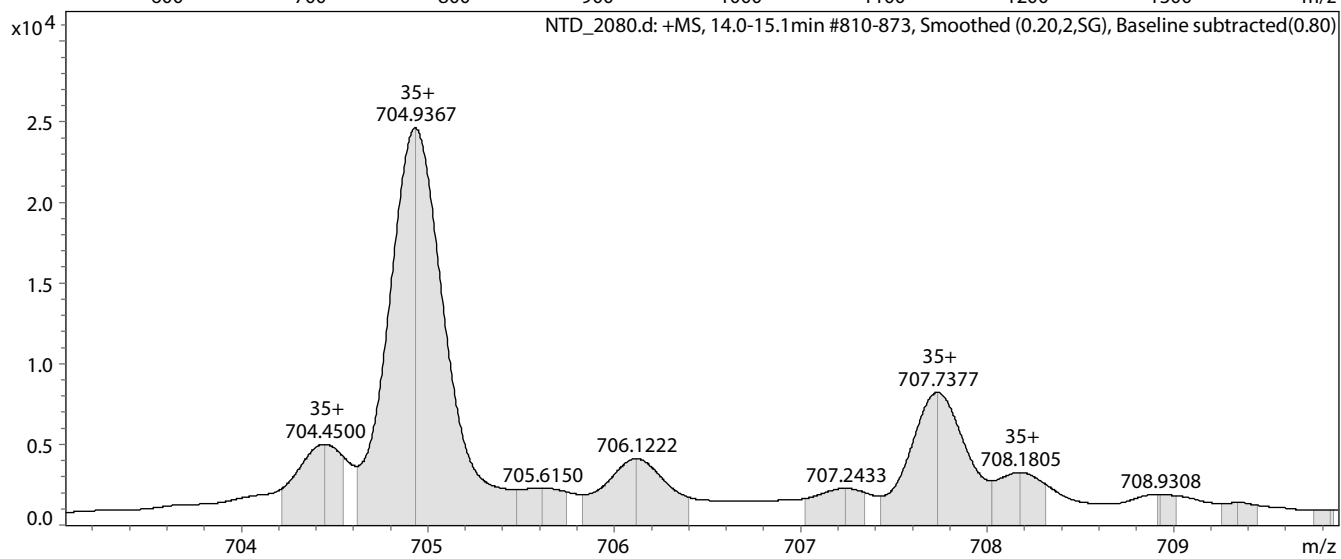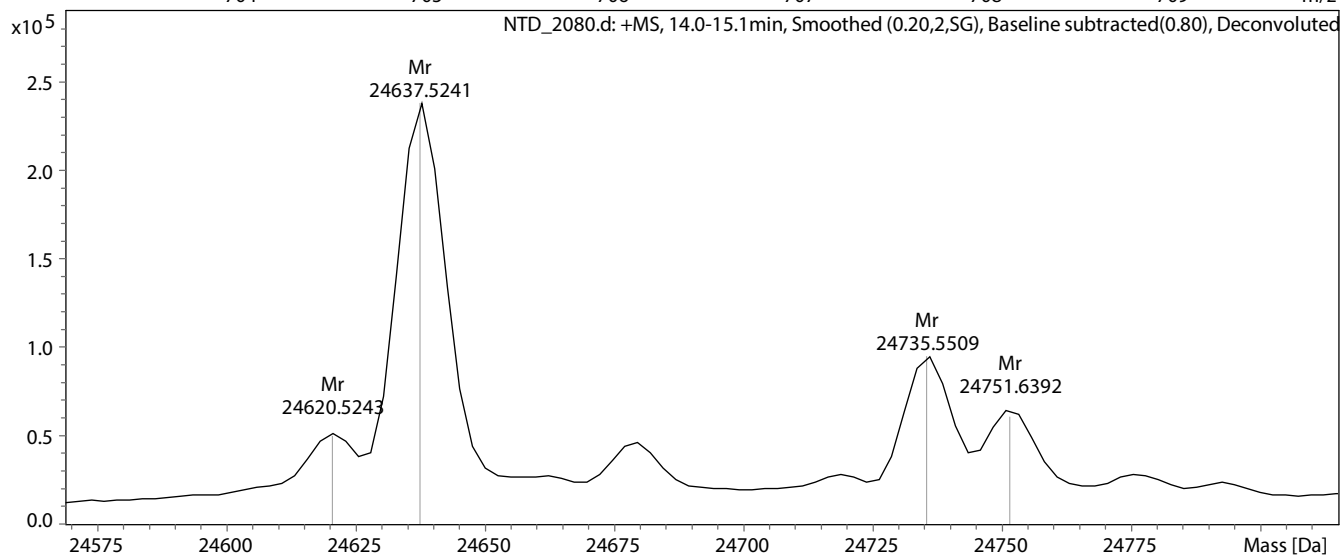

Supplement: NP_FigS5.pdf [file NP_FigS5.pdf]
