# Supplementary material for: Antigenic properties of the SARS-CoV-2 nucleoprotein are altered by the RNA admixture
Source: PeerJ journal article supplement (doi:10.7717/peerj.12751), 2022-01-07

**A**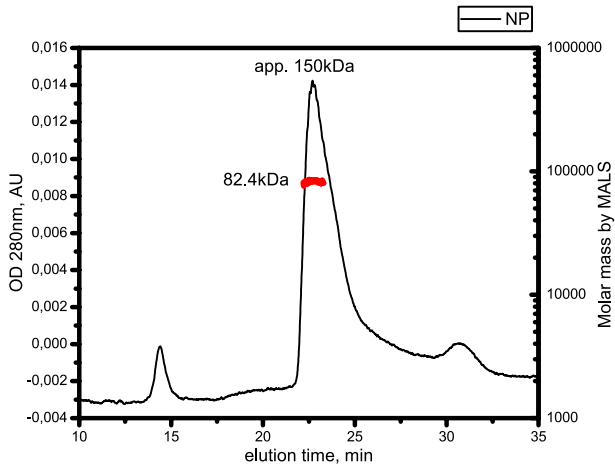**B**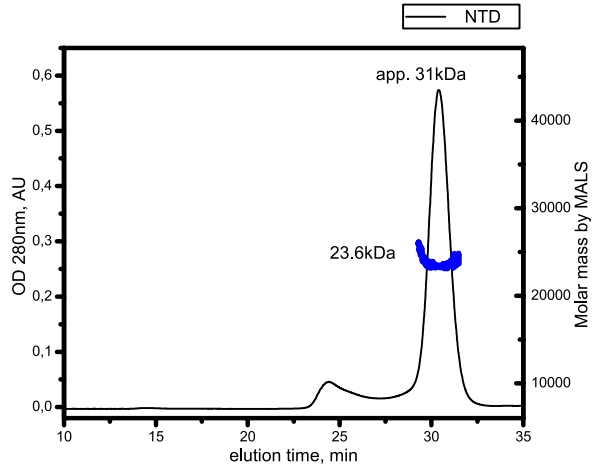

Supplement: NP_FigS7.pdf [file NP_FigS7.pdf]
